# Supplementary material for: Simultaneously Enhanced Thermal Conductivity and Dielectric Breakdown Strength in Sandwich AlN/Epoxy Composites
Source: MDPI journal article supplement (doi:10.3390/nano11081898), 2021-07-24
Supplement: s1 [file s1]

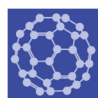

# Simultaneously Enhanced Thermal Conductivity and Dielectric Breakdown Strength in Sandwich AlN/Epoxy Composites

Zhengdong Wang <sup>1,2</sup>, Xiaozhuo Wang <sup>1</sup>, Silong Wang <sup>1</sup>, Jieyu He <sup>1</sup>, Tong Zhang <sup>1</sup>, Juan Wang <sup>1,2</sup> and Guanglei Wu <sup>3,\*</sup>

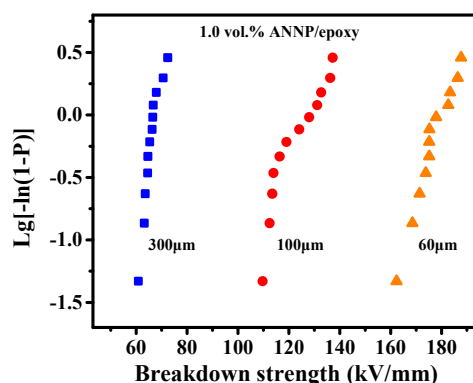

Figure S1. Weibull distribution for breakdown strength of 1.0 vol.% ANNP/epoxy composites with different thickness.

Table S1. Characteristic breakdown strength of ANNP/epoxy composites with different ANNP loading.

| Samples        | Breakdown strength (kV/mm) |
|----------------|----------------------------|
| Neat epoxy     | 64.45                      |
| 0.3 vol.% ANNP | 64.88                      |
| 0.5 vol.% ANNP | 65.62                      |
| 1.0 vol.% ANNP | 66.5                       |
| 2.0 vol.% ANNP | 62.24                      |

Table S2. Thermal conductivity and volume fraction of inner layer and outer layers in sandwich composites.

| Sample                | Predicted thermal conductivity (W/m·K) |      |      |       |      | Volume fraction (vol %) |                |                |
|-----------------------|----------------------------------------|------|------|-------|------|-------------------------|----------------|----------------|
|                       | Kc1                                    | Kc2  | K1   | K2    | K3   | Φ <sub>1</sub>          | Φ <sub>2</sub> | Φ <sub>3</sub> |
| 1.0 vol.% ANNP/epoxy  |                                        |      | -    | 0.200 | -    |                         |                |                |
| 35.6 vol.% ANNP/epoxy |                                        |      | 2.30 | -     | 2.30 |                         |                |                |
| 90-120                | 0.442                                  | 1.46 |      |       |      | 9/30                    | 12/30          | 9/30           |
| 100-100               | 0.511                                  | 1.60 |      |       |      | 10/30                   | 10/30          | 10/30          |
| 110-80                | 0.605                                  | 1.74 |      |       |      | 11/30                   | 8/30           | 11/30          |
| 120-60                | 0.742                                  | 1.88 |      |       |      | 12/30                   | 6/30           | 12/30          |
| 130-40                | 0.958                                  | 2.02 |      |       |      | 13/30                   | 4/30           | 13/32          |
